# Supplementary material for: Diagnostic Delays in Acute Care Settings in Clinics in Damascus University Affiliated Hospitals: A Cross-Sectional Study of Patient- and Systemic-Related Factors
Source: Research Square preprint supplement (doi:10.21203/rs.3.rs-8034773/v1), 2025-12-30
Supplement: Supplementary file 1 [file 7174d5608490af91ccd30bdb.docx]

**Questionnaire**

**Section 1: Demographics Question Response Format**

**Age:**

___ years

**Sex:**

☐ Male ☐ Female

**Residence:**

☐ City ☐ Countryside ☐ Suburban

**Education level:**

☐ Illiterate ☐ Primary ☐ Secondary ☐ University ☐ Postgraduate

**Employment status:**

☐ Employed ☐ Unemployed ☐ Student ☐ Retired

**Monthly household income (SYP):**

☐ <500,000 ☐ 500,000–1,500,000 ☐ 1,500,000–2,500,000 ☐ 2,500,000–5,000,000

☐ >5,000,000

**Health insurance:**

☐ None ☐ Public ☐ Private

**Usual source of care:**

☐ Public clinic ☐ Private clinic ☐ Pharmacy ☐ Other: _______________

**Section 2: Patient Delay (Symptom Onset to First Visit)**
**Intro: “These questions are about your experience from when you first noticed your symptoms to when you first saw a doctor.”**

**1. What symptom(s) led you to seek care?**

Open-ended

**2. When did your symptom(s) start?**

Date

**3. When did you first seek medical help?**

Date

**4. How long after first noticing your symptoms did you seek medical help?**☐ Same day ☐ 1–7 days ☐ 1–4 weeks ☐ Over a month ☐ I did not seek help

**5. Why did you wait before seeking care? (select all that apply)**

☐ Cost concerns ☐ I thought it would go away ☐ Lack of transportation ☐ Clinic too far ☐ Didn’t know it was serious ☐ Other: ___

**6. How would you rate your knowledge of the symptoms?**

☐ Very poor ☐ Poor ☐ Fair ☐ Good ☐ Excellent

**7. How easy is it for you to find information about symptoms that concern you?**
☐ Very difficult ☐ Difficult ☐ Neutral ☐ Easy ☐ Very easy

**8. How easy is it for you to understand your doctor’s or nurse’s explanations about your symptoms?**
☐ Very difficult ☐ Difficult ☐ Neutral ☐ Easy ☐ Very easy

**9. Did you try any home remedies before seeking care?**

☐ Yes ☐ No

**10. How confident were you that a doctor was needed? 5-point Likert: 1 (Not confident) – 5 (Very confident)**

**11. Did anyone influence your decision to go to the clinic**?

☐ Yes ☐ No → If yes: ☐ Family ☐ Friends ☐ Pharmacist ☐ Other: ___

**12**. **How far is the nearest clinic from your home?**
☐ < 1 km ☐ 1–5 km ☐ > 5 km

**13. Is cost a barrier that prevents you from seeing a doctor?**☐ Always ☐ Sometimes ☐ Rarely ☐ Never

**Section 3: Systemic Delay (First Visit to Diagnosis)**

**Intro: “Now we ask about your experience after you visited a healthcare provider.”**

**1. Where did you first go for care?**

☐ Public clinic ☐ Private doctor ☐ Pharmacy ☐ Emergency room

**2. Were you referred to another provider?**

☐ Yes ☐ No

**3. After seeking medical help, how long did it take until you received a clear diagnosis?**☐ Same day
☐ 1–3 days
☐ 4–7 days
☐ 8–14 days
☐ More than 2 weeks (if applicable)

**4. How many visits did it take to receive a diagnosis?**

Numeric

**5. How long did you wait for any of the following? (Dropdowns with ranges)**

**Lab test:**

☐ Same day ☐ 1–3 days ☐ 4–7 days ☐ >1 week

**Specialist appointment:**

☐ Same day ☐ 1–3 days ☐ 4–7 days ☐ >1 week

**Results explanation:**

☐ Same day ☐ 1–3 days ☐ 4–7 days ☐ >1 week

**6. What caused the most delay?**

☐ Appointment availability ☐ Waiting for test

results ☐ Referral delays ☐ Misdiagnosis ☐ Facility overcrowded ☐ Other: ___

**7. How would you rate the communication with healthcare staff? 5-point Likert**

**8. How much do you trust the public health system? 5-point Likert**

**9. I trust that the healthcare system in my country always acts in the best interests of patients.**
☐ Strongly disagree ☐ Disagree ☐ Neutral ☐ Agree ☐ Strongly agree

**10. The healthcare system in my country sometimes puts financial interests ahead of patient care.**
☐ Strongly disagree ☐ Disagree ☐ Neutral ☐ Agree ☐ Strongly agree

**11. If you paid out-of-pocket for tests, how much did it cost?**

☐ <10,000 SYP ☐ 10–25k ☐ 25–50k ☐ 50k-100k ☐100k-200k ☐200k-400k ☐400k-1m ☐>1m

**12. Were any delays caused by administrative procedures**

☐ Yes ☐ No ☐ Not sure
